# Supplementary material
Source: MDPI journal article supplement (https://www.mdpi.com/2305-6320/8/4/17)
Supplement: s1 [file s1]

# Supplementary Materials: A Unique Anti-Cancer 3-Styrylchromone Suppresses Inflammatory Response via HMGB1-RAGE Signaling

Hideaki Abe, Miwa Okazawa, Takahiro Oyama, Hiroaki Yamazaki, Atsushi Yoshimori, Takanori Kamiya, Mitsutoshi Tsukimoto, Koichi Takao, Yoshiaki Sugita, Hiroshi Sakagami, Takehiko Abe and Sei-ichi Tanuma

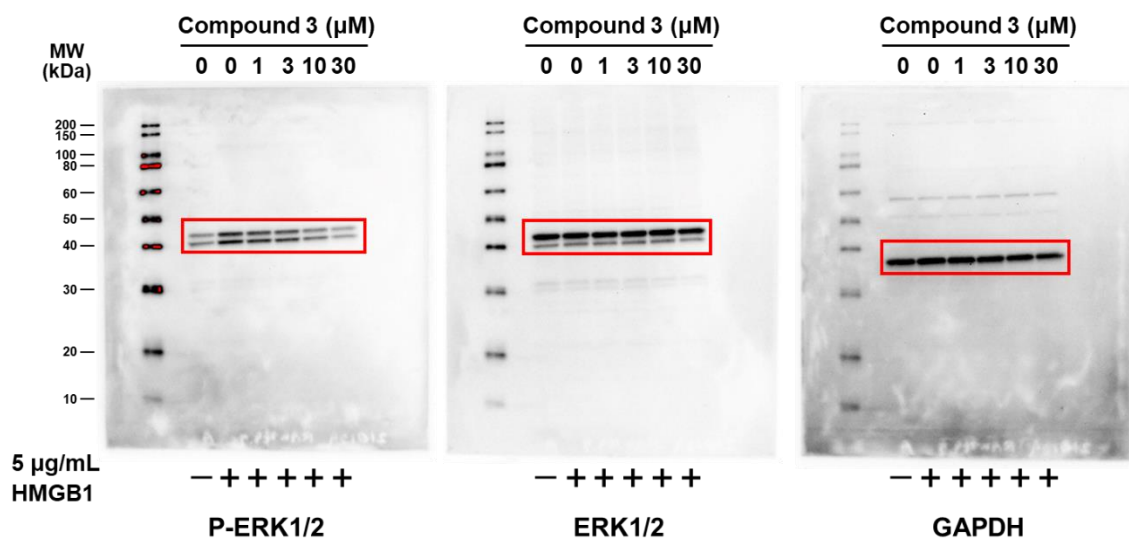

**Figure S1.** Original scans for the immunoblots in Figure 4. Western blotting of samples was performed as described in the Materials and Methods.
